# Supplementary material for: Direct Growth of Patterned Vertical Graphene Using Thermal Stress Mismatch between Barrier Layer and Substrate
Source: MDPI journal article supplement (doi:10.3390/nano13071242), 2023-03-31
Supplement: s1 [file s1]

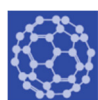

## Supplementary Materials

# Direct Growth of Patterned Vertical Graphene Using Stress Mismatch between Sacrificial Layer and Substrate

Fengsong Qian <sup>1,§</sup>, Jun Deng <sup>1,§</sup>, Xiaochen Ma <sup>1</sup>, Liangchen Hu <sup>1</sup>, Guosheng Fu <sup>2</sup>, and Chen Xu <sup>1,\*</sup>

<sup>1</sup> Key Laboratory of Optoelectronics Technology, Ministry of Education, Beijing University of Technology, Beijing 100124, China

<sup>2</sup> Fert Beijing Institute and School of Microelectronics, Beihang University, Beijing 100191, China

\* Correspondence: xuchen58@bjut.edu.cn

† These authors contributed equally to this work.

**Table S1.** Physical and mechanical properties used in the simulation of stress distribution.

|                  | Thermal conductivity |                   | CTE    |                                | Elastic modulus |         | Poisson's ratio |       | References |
|------------------|----------------------|-------------------|--------|--------------------------------|-----------------|---------|-----------------|-------|------------|
|                  | T (°C)               | $\lambda$ (W/m·K) | T (°C) | $\alpha$ (10 <sup>-6</sup> /K) | T (°C)          | E (GPa) | T (°C)          | $\nu$ |            |
| Si               | 20                   | 139.4             | 27     | 2.59                           | 25              | 168.1   | 27              | 0.278 | [42-45]    |
|                  | 200                  | 82.4              | 127    | 3.2                            | 100             | 167.6   |                 |       |            |
|                  | 400                  | 50.3              | 227    | 3.59                           | 200             | 166.6   |                 |       |            |
|                  | 600                  | 36.7              | 327    | 3.83                           | 300             | 164.8   |                 |       |            |
|                  | 800                  | 27.4              | 427    | 3.99                           | 400             | 163.2   |                 |       |            |
|                  | 1000                 | 23.7              | 527    | 4.1                            | 500             | 162.4   |                 |       |            |
|                  |                      |                   |        |                                | 600             | 160.3   |                 |       |            |
| SiO <sub>2</sub> |                      |                   | 0      | 0.4                            | 0               | 71.8    | 27              | 0.19  | [46-49]    |
|                  |                      |                   | 100    | 0.62                           | 100             | 71.4    |                 |       |            |
|                  |                      |                   | 200    | 0.75                           | 200             | 70.8    |                 |       |            |
|                  | 27                   | 1.3               | 300    | 0.7                            | 300             | 70.5    |                 |       |            |
|                  |                      |                   | 400    | 0.65                           | 400             | 70.2    |                 |       |            |
|                  |                      |                   | 500    | 0.6                            | 500             | 70.1    |                 |       |            |
|                  |                      |                   | 600    | 0.5                            | 600             | 70.05   |                 |       |            |
| Cr               | 27                   | 93                | 127    | 8.12                           | 27              | 275     | 27              | 0.21  | [50-53]    |
|                  | 127                  | 91.8              | 227    | 9                              | 77              | 274     |                 |       |            |
|                  | 227                  | 87.7              | 327    | 9.58                           | 127             | 273     |                 |       |            |
|                  | 327                  | 83.3              | 427    | 10.1                           | 177             | 272     |                 |       |            |
|                  | 427                  | 78.8              | 527    | 10.8                           | 227             | 270     |                 |       |            |
|                  | 527                  | 74.9              | 627    | 11.3                           | 277             | 268     |                 |       |            |
|                  | 627                  | 71.8              | 727    | 11.8                           | 327             | 265     |                 |       |            |
|                  | 727                  | 69.6              | 827    | 12.2                           | 377             | 262     |                 |       |            |
|                  |                      |                   | 927    | 12.7                           |                 |         |                 |       |            |
|                  |                      |                   |        |                                |                 |         |                 |       |            |
| VG               | 27                   | 2000              |        |                                |                 |         | 27              | 0.16  | [54-57]    |
|                  | 127                  | 1200              | 27     | −1.1                           | 27              | 49      |                 |       |            |
|                  | 227                  | 1010              | 100    | −0.4                           | 200             | 50      |                 |       |            |
|                  | 327                  | 900               | 200    | 0.5                            | 400             | 51      |                 |       |            |
|                  | 427                  | 690               | 300    | 1.4                            | 600             | 53      |                 |       |            |
|                  | 527                  | 600               | 400    | 2.3                            | 800             | 55      |                 |       |            |

---

|     |     |     |     |      |    |
|-----|-----|-----|-----|------|----|
| 627 | 510 | 500 | 3.3 | 1000 | 61 |
| 727 | 500 |     |     |      |    |

---

Nanomaterials 2022, 5, x. <https://doi.org/10.3390/xxxxx>[www.mdpi.com/journal/nanomaterials](http://www.mdpi.com/journal/nanomaterials)

---

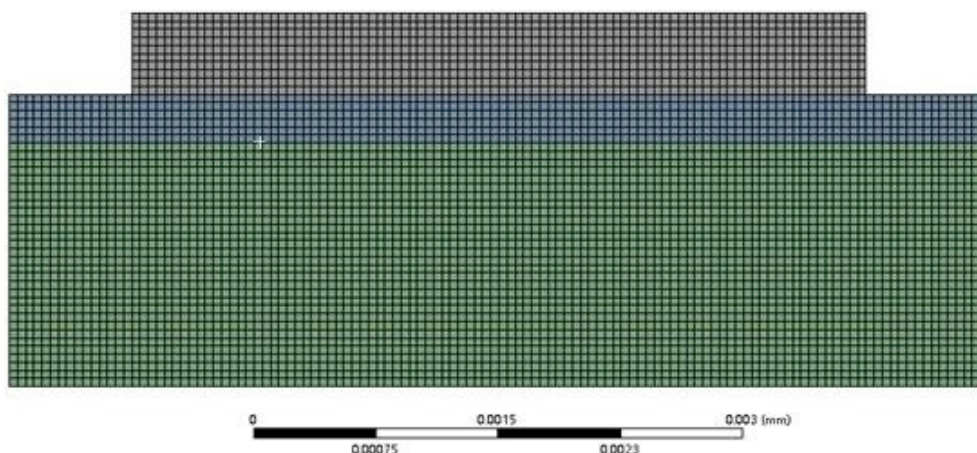

**Figure S1.** FE model for thermal stress analysis of a SiO<sub>2</sub>/Si substrate with patterned Cr film (before VG synthesis).

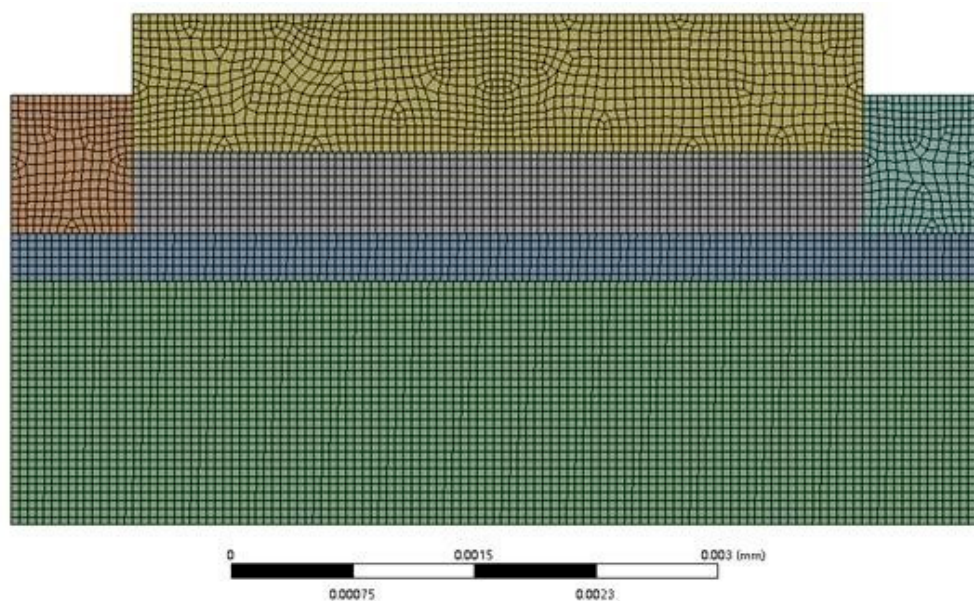

**Figure S2.** FE model for thermal stress analysis of a SiO<sub>2</sub>/Si substrate with VG and patterned Cr film (after VG synthesis).

## References

42. Yamasue, E.; Susa, M.; Fukuyama, H.; Nagata, K., Thermal conductivities of silicon and germanium in solid and liquid states measured by non-stationary hot wire method with silica coated probe. *J. Cryst. Growth* **2002**, *234*, 121-131.
43. Zhang, W.; Yu, H.; Lei, S.; Huang, Q., Modeling of silicon thermal expansion using strained phonon spectra. *J. Micromech. Microeng.* **2012**, *22*, 85007.
44. Jeung-hyun, J.; Sung-hoon, C.; Se-Ho, L.; Dongil, K., Evaluation of elastic properties and temperature effects in Si thin films using an electrostatic microresonator. *J. Microelectromech. Syst.* **2003**, *12*, 524-530.
45. Cho, C., Characterization of Young's modulus of silicon versus temperature using a "beam deflection" method with a four-point bending fixture. *Curr. Appl. Phys.* **2009**, *9*, 538-545.
46. Yamane, T.; Nagai, N.; Katayama, S.; Todoki, M., Measurement of thermal conductivity of silicon dioxide thin films using a 3 $\omega$  method. *J. Appl. Phys.* **2002**, *91*, 9772-9776.

47. Li, C.; Yang, M.; Quan, B.; Guan, W., Stress Simulation Analysis of Multilayer Film Deposition. *Laser & Optoelectronics Progress* **2018**, *55*, 043101.
48. Soh, M. T. K.; Thurn, J.; Thomas, J. H.; Talghader, J. J., Thermally induced stress hysteresis and co-efficient of thermal expansion changes in nanoporous SiO<sub>2</sub>. *J. Phys. D: Appl. Phys.* **2007**, *40*, 2176-2182.
49. Çetinörgü, E., A new method to experimentally determine the thermal expansion coefficient, Poisson's ratio and Young's modulus of thin films. *J. Mater. Sci.* **2009**, *44*, 2167-2170.
50. Moore, J. P.; Williams, R. K.; Graves, R. S., Thermal conductivity, electrical resistivity, and Seebeck coefficient of high-purity chromium from 280 to 1000 K. *J. Appl. Phys.* **1977**, *48*, 610-617.
51. White, G. K.; Roberts, R. B.; Fawcett, E., Thermal expansion of Cr and CrV alloys. I. Experiment. *J. Phys. F: Met. Phys.* **1986**, *16*, 449-459.
52. Choi, I.; Brandl, C.; Schwaiger, R., Thermally activated dislocation plasticity in body-centered cubic chromium studied by high-temperature nanoindentation. *Acta Mater.* **2017**, *140*, 107-115.
53. Wu, D.; Nieh, T. G., Incipient plasticity and dislocation nucleation in body-centered cubic chromium. *Mater. Sci. Eng. A* **2014**, *609*, 110-115.
54. Prasher, R., Thermal boundary resistance and thermal conductivity of multiwalled carbon nanotubes. *Phys. Rev. B* **2008**, *77*, 75424.
55. Akikubo, K.; Kurahashi, T.; Kawaguchi, S.; Tachibana, M., Thermal expansion measurements of nano-graphite using high-temperature X-ray diffraction. *Carbon* **2020**, *169*, 307-311.
56. Maruyama, T.; Eto, M.; Oku, T., Elastic modulus and bend strength of a nuclear graphite at high temperature. *Carbon* **1987**, *25*, 723-726.
57. Blakslee, O. L.; Proctor, D. G.; Seldin, E. J.; Spence, G. B.; Weng, T., Elastic Constants of Compression-Annealed Pyrolytic Graph-ite. *J. Appl. Phys.* **1970**, *41*, 3373-3382.
